# Supplementary material for: Platelet function is disturbed by the angiogenesis inhibitors sunitinib and sorafenib, but unaffected by bevacizumab
Source: PubMed Central journal article supplement (PMC5878190; doi:10.1007/s10456-018-9598-5), 2018-03-12
Supplement: 10456_2018_9598_MOESM4_ESM.pdf [file 10456_2018_9598_MOESM4_ESM.pdf]

| Patients | Collagen |          |          | ADP      |          |          | Co-medication        |
|----------|----------|----------|----------|----------|----------|----------|----------------------|
|          | 24hr     | 3wk      | 6wk      | 24hr     | 3wk      | 6wk      |                      |
| 1        | No (3)   | No (1)   | No (2)   | Yes      | No (1)   | No (2)   | Acetylsalicylic acid |
| 2        | Yes      | Yes      | Yes      | Yes      | Yes      | No (3)   |                      |
| 3        | Yes      | Yes      | Yes      | Yes      | Yes      | Yes      |                      |
| 4        | Yes      | Yes      | Yes      | Yes      | Yes      | Yes      |                      |
| 5        | No (3)   | No (2)   | No (2)   | No (3)   | No (2)   | No (2)   |                      |
| 6        | Yes      | Yes      | No (4)   | Yes      | Yes      | No (4)   |                      |
| 7        | Yes      | No (2)   | No (2)   | Yes      | No (2)   | No (2)   |                      |
| 8        | Yes      | Yes      | Yes      | Yes      | Yes      | Yes      | Fraxodi              |
| 9        | Yes      | No (3)   | No (3)   | No (5)   | No (5)   | No (5)   |                      |
| 10       | No (5)   | No (5)   | No (5)   | No (3)   | No (2)   | No (2)   |                      |
| 11       | No (5)   | No (5)   | No (5)   | No (5)   | No (5)   | No (5)   | Acetylsalicylic acid |
| 12       | No (5)   | No (5)   | No (5)   | Yes      | Yes      | Yes      | Acetylsalicylic acid |
| 13       | No (5)   | No (5)   | No (5)   | No (5)   | No (5)   | No (5)   | Fraxodi              |
| 14       | No (5)   | No (5)   | No (5)   | Yes      | No (2)   | No (2)   | Acetylsalicylic acid |
| 15       | No (5)   | No (5)   | No (5)   | Yes      | Yes      | Yes      | Fragmin              |
| 16       | No (1/5) | No (1/5) | No (1/5) | No (1/5) | No (1/5) | No (1/5) |                      |
| 17       | Yes      | No (2)   | No (2)   | Yes      | No (2)   | No (2)   |                      |
