# Supplementary material for: Platelet function is disturbed by the angiogenesis inhibitors sunitinib and sorafenib, but unaffected by bevacizumab
Source: PubMed Central journal article supplement (PMC5878190; doi:10.1007/s10456-018-9598-5), 2018-03-12
Supplement: 10456_2018_9598_MOESM5_ESM.pdf [file 10456_2018_9598_MOESM5_ESM.pdf]

| Patients | Collagen |         | ADP    |         | Co-medication        |
|----------|----------|---------|--------|---------|----------------------|
|          | 5hrs     | day 3-5 | 5hrs   | day 3-5 |                      |
| 1        | No (3)   | Yes     | No (3) | Yes     |                      |
| 2        | Yes      | Yes     | No (5) | No (5)  |                      |
| 3        | Yes      | Yes     | Yes    | Yes     |                      |
| 4        | No (1)   | Yes     | No (1) | Yes     | Acenocoumarol        |
| 5        | No (5)   | No (5)  | Yes    | Yes     |                      |
| 6        | Yes      | Yes     | Yes    | Yes     |                      |
| 7        | Yes      | Yes     | Yes    | Yes     |                      |
| 8        | No (5)   | No (5)  | Yes    | Yes     | Acetylsalicylic acid |
