# Supplementary material for: Platelet function is disturbed by the angiogenesis inhibitors sunitinib and sorafenib, but unaffected by bevacizumab
Source: PubMed Central journal article supplement (PMC5878190; doi:10.1007/s10456-018-9598-5), 2018-03-12
Supplement: 10456_2018_9598_MOESM6_ESM.pdf [file 10456_2018_9598_MOESM6_ESM.pdf]

|               | <b>Concentration Sunitinib (nM)</b> |              |
|---------------|-------------------------------------|--------------|
|               | <b>24hr</b>                         | <b>3wk</b>   |
| <b>Plasma</b> | <b>78.3</b>                         | <b>151.8</b> |
| <b>N</b>      | <b>17</b>                           | <b>9</b>     |
| <b>SEM</b>    | <b>9.7</b>                          | <b>21.3</b>  |
| <b>Serum</b>  | <b>99.2</b>                         | <b>191</b>   |
| <b>N</b>      | <b>17</b>                           | <b>8</b>     |
| <b>SEM</b>    | <b>13.2</b>                         | <b>30.2</b>  |
